# Supplementary material for: Inferring the Disease-Associated miRNAs Based on Network Representation Learning and Convolutional Neural Networks
Source: MDPI journal article supplement (doi:10.3390/ijms20153648), 2019-07-25
Supplement: s1 [file s1]

**Supplementary Table S1 the top 50 breast neoplasms -related miRNA candidates**

| <b>Rank</b> | <b>MiRNA Name</b> | <b>Evidence</b>                   |
|-------------|-------------------|-----------------------------------|
| 1           | hsa-mir-99a       | dbDEMC, PhenomiR, miRCancer       |
| 2           | hsa-mir-106a      | dbDEMC                            |
| 3           | hsa-mir-372       | dbDEMC, PhenomiR                  |
| 4           | hsa-mir-185       | dbDEMC, PhenomiR, miRCancer       |
| 5           | hsa-mir-138       | dbDEMC, PhenomiR, miRCancer       |
| 6           | hsa-mir-150       | dbDEMC, PhenomiR, miRCancer       |
| 7           | hsa-mir-378a      | TCGA                              |
| 8           | hsa-mir-142       | Literature                        |
| 9           | hsa-mir-192       | dbDEMC, PhenomiR                  |
| 10          | hsa-mir-15b       | dbDEMC, PhenomiR                  |
| 11          | hsa-mir-92b       | dbDEMC                            |
| 12          | hsa-mir-542       | Literature                        |
| 13          | hsa-mir-98        | dbDEMC, PhenomiR, miRCancer       |
| 14          | hsa-mir-95        | dbDEMC, PhenomiR                  |
| 15          | hsa-mir-184       | dbDEMC, PhenomiR                  |
| 16          | hsa-mir-449a      | dbDEMC, PhenomiR, miRCancer       |
| 17          | hsa-mir-196b      | dbDEMC, PhenomiR                  |
| 18          | hsa-mir-186       | dbDEMC, PhenomiR                  |
| 19          | hsa-mir-130a      | dbDEMC, PhenomiR, miRCancer       |
| 20          | hsa-mir-449b      | dbDEMC                            |
| 21          | hsa-mir-99b       | dbDEMC, PhenomiR                  |
| 22          | hsa-mir-28        | dbDEMC, PhenomiR                  |
| 23          | hsa-mir-130b      | dbDEMC, PhenomiR                  |
| 24          | hsa-mir-212       | dbDEMC, PhenomiR, miRCancer       |
| 25          | hsa-mir-1254      | dbDEMC                            |
| 26          | hsa-mir-1224      | dbDEMC                            |
| 27          | hsa-mir-494       | dbDEMC, PhenomiR, miRCancer, TCGA |
| 28          | hsa-mir-32        | dbDEMC, PhenomiR, miRCancer       |
| 29          | hsa-mir-330       | dbDEMC, PhenomiR, miRCancer       |
| 30          | hsa-mir-744       | dbDEMC                            |
| 31          | hsa-mir-211       | dbDEMC, PhenomiR, miRCancer       |
| 32          | hsa-mir-302f      | dbDEMC                            |
| 33          | hsa-mir-384       | dbDEMC, miRCancer                 |
| 34          | hsa-mir-181c      | dbDEMC, PhenomiR                  |
| 35          | hsa-mir-498       | dbDEMC, PhenomiR, miRCancer       |
| 36          | hsa-mir-30e       | Literature                        |
| 37          | hsa-mir-363       | dbDEMC                            |
| 38          | hsa-mir-421       | dbDEMC, miRCancer                 |
| 39          | hsa-mir-302e      | dbDEMC                            |
| 40          | hsa-mir-208a      | dbDEMC, PhenomiR                  |
| 41          | hsa-mir-216b      | dbDEMC, miRCancer, TCGA           |

|    |              |                             |
|----|--------------|-----------------------------|
| 42 | hsa-mir-216a | dbDEMC, PhenomiR            |
| 43 | hsa-mir-198  | dbDEMC, PhenomiR, miRCancer |
| 44 | hsa-mir-33b  | dbDEMC, PhenomiR, miRCancer |
| 45 | hsa-mir-181d | dbDEMC, PhenomiR            |
| 46 | hsa-mir-144  | dbDEMC, PhenomiR, miRCancer |
| 47 | hsa-mir-33a  | dbDEMC, PhenomiR, miRCancer |
| 48 | hsa-mir-433  | dbDEMC, PhenomiR, miRCancer |
| 49 | hsa-mir-1271 | dbDEMC, miRCancer           |
| 50 | hsa-mir-663b | dbDEMC, PhenomiR            |

---
