# Supplementary material for: Inferring the Disease-Associated miRNAs Based on Network Representation Learning and Convolutional Neural Networks
Source: MDPI journal article supplement (doi:10.3390/ijms20153648), 2019-07-25
Supplement: s1 [file s1]

**Supplementary Table S2 the top 50 pancreatic neoplasms-related miRNA candidates**

| <b>Rank</b> | <b>MiRNA Name</b> | <b>Evidence</b>                   |
|-------------|-------------------|-----------------------------------|
| 1           | hsa-mir-9         | dbDEMC, PhenomiR, miRCancer       |
| 2           | hsa-mir-106b      | dbDEMC, PhenomiR                  |
| 3           | hsa-mir-1         | dbDEMC, PhenomiR, miRCancer       |
| 4           | hsa-mir-29a       | dbDEMC, PhenomiR, miRCancer       |
| 5           | hsa-mir-181a      | dbDEMC, PhenomiR, miRCancer       |
| 6           | hsa-mir-130a      | dbDEMC, PhenomiR                  |
| 7           | hsa-mir-7         | dbDEMC, PhenomiR, miRCancer       |
| 8           | hsa-mir-19a       | dbDEMC                            |
| 9           | hsa-mir-22        | dbDEMC, PhenomiR                  |
| 10          | hsa-mir-125a      | dbDEMC, PhenomiR                  |
| 11          | hsa-mir-30a       | dbDEMC, PhenomiR                  |
| 12          | hsa-mir-29c       | dbDEMC, PhenomiR, miRCancer       |
| 13          | hsa-mir-20b       | dbDEMC                            |
| 14          | hsa-mir-141       | dbDEMC, PhenomiR, miRCancer       |
| 15          | hsa-mir-133a      | dbDEMC, PhenomiR, miRCancer, TCGA |
| 16          | hsa-mir-205       | dbDEMC, PhenomiR, miRCancer       |
| 17          | hsa-mir-19b       | dbDEMC, TCGA                      |
| 18          | hsa-mir-193b      | dbDEMC                            |
| 19          | hsa-mir-335       | dbDEMC, PhenomiR                  |
| 20          | hsa-mir-302a      | dbDEMC, PhenomiR                  |
| 21          | hsa-mir-499a      | Literature                        |
| 22          | hsa-mir-193a      | PhenomiR                          |
| 23          | hsa-mir-138       | dbDEMC, PhenomiR, miRCancer       |
| 24          | hsa-mir-302c      | dbDEMC, PhenomiR                  |
| 25          | hsa-mir-195       | dbDEMC, PhenomiR                  |
| 26          | hsa-mir-629       | dbDEMC, miRCancer                 |
| 27          | hsa-mir-27b       | dbDEMC, PhenomiR                  |
| 28          | hsa-mir-302b      | dbDEMC, PhenomiR                  |
| 29          | hsa-mir-127       | dbDEMC, miRCancer                 |
| 30          | hsa-mir-30d       | dbDEMC, PhenomiR                  |
| 31          | hsa-mir-135a      | dbDEMC, PhenomiR                  |
| 32          | hsa-mir-373       | dbDEMC, PhenomiR, miRCancer       |
| 33          | hsa-mir-98        | dbDEMC, PhenomiR                  |
| 34          | hsa-mir-137       | dbDEMC, PhenomiR, miRCancer       |
| 35          | hsa-mir-18b       | dbDEMC                            |
| 36          | hsa-mir-152       | dbDEMC, PhenomiR, miRCancer       |
| 37          | hsa-mir-93        | dbDEMC, PhenomiR                  |
| 38          | hsa-mir-497       | dbDEMC, miRCancer                 |
| 39          | hsa-mir-206       | dbDEMC, PhenomiR                  |
| 40          | hsa-mir-320a      | dbDEMC, PhenomiR, miRCancer       |
| 41          | hsa-mir-372       | Literature                        |

|    |              |                        |
|----|--------------|------------------------|
| 42 | hsa-mir-494  | dbDEMC, miRCancer      |
| 43 | hsa-mir-92b  | dbDEMC                 |
| 44 | hsa-mir-483  | Literature             |
| 45 | hsa-mir-185  | dbDEMC, miRCancer      |
| 46 | hsa-mir-342  | dbDEMC, PhenomiR       |
| 47 | hsa-mir-219  | Literature             |
| 48 | hsa-mir-302d | dbDEMC, PhenomiR       |
| 49 | hsa-mir-149  | dbDEMC                 |
| 50 | hsa-mir-129  | dbDEMC, PhenomiR, TCGA |

---
